# Supplementary material for: Agrobacterium tumefaciens-Mediated Transformation of NHEJ Mutant Aspergillus nidulans Conidia: An Efficient Tool for Targeted Gene Recombination Using Selectable Nutritional Markers
Source: MDPI journal article supplement (doi:10.3390/jof7110961), 2021-11-12
Supplement: s1 [file s1]

**Table S2.** Oligonucleotide primers used.

| Number | Primer name - restriction site(s)             | Primer sequence*                             |
|--------|-----------------------------------------------|----------------------------------------------|
| 111    | Afrib-1T                                      | 5'-GTGCGATTACATGAAGGTCC-3'                   |
| 113    | Afrib-2T                                      | 5'-TGCTCGTCACACTCATGTAACG-3'                 |
| 545    | AN9425-3' F                                   | 5'-AGCCTCGCGACGGATATTAAG-3'                  |
| 546    | AN9425-3' Rev - <i>Hae</i> II                 | 5'-ACTAT <u>GGCGCT</u> GTTGGCAGAC-3'         |
| 551    | AN8209-wA 5' F - <i>Bam</i> HI                | 5'-ggttaggatccGTGTGATCATCTGAGCTCTGG-3'       |
| 552    | AN8209-wA 5' Rev - <i>Eco</i> RI              | 5'-aagggaattcgatATCAGGAGAAGGAGAGTCAAGTCC-3'  |
| 553    | AN8209-wA 3' F - <i>Eco</i> RI                | 5'-aagggaattcTTGTGAGCGCCGGTTGGTCTG-3'        |
| 554    | AN8209-wA 3' Rev - <i>Sal</i> I, <i>Not</i> I | 5'-cacaagtgcagcgcgcgCAATGCTGCTGCGCACTCTGG-3' |
| 573    | AN8423-5' F - <i>Kpn</i> I, <i>Spe</i> I      | 5'-gaagggtaccactagtCAGCCGAACCTCTCAAACCTTC-3' |
| 574    | AN8423-5' Rev - <i>Sal</i> I                  | 5'-acggaggtcgacGTGCCCTTAATTGTGCTACTG-3'      |
| 575    | AN8423-3' F - <i>Sal</i> I                    | 5'-acggaggtcgacGTGTTGCCTACTCCTGAAATG-3'      |
| 576    | AN8423-3' Rev - <i>Spe</i> I                  | 5'-tacaggactagtGCATCATTGGTCTAGTGGTAG-3'      |
| 641    | AN8423 5' outer                               | 5'-ATTCAGTGTGTTGGCAGCCGTGG-3'                |
| 642    | Tr_pyr4 3' out                                | 5'-ATTTGCTTTTGC GCGTGGAGG-3'                 |
| 643    | Tr_pyr4 5' out                                | 5'-TCTGCTGTGCGAATGACGTTGG-3'                 |
| 644    | AN8423 3' retuo                               | 5'-TGAAGCTACAGAGTTACGACC-3'                  |
| 741    | wA 5 outer                                    | 5'-TGAAGCTACAGAGTTACGACC-3'                  |
| 742    | wA 3 retuo                                    | 5'-ACAACAGAGAATGCAGCACTGG-3'                 |

\* Restriction enzyme recognition sites are specified and underlined; capital letters correspond to gene-specific sequences.
