# Supplementary material for: Agrobacterium tumefaciens-Mediated Transformation of NHEJ Mutant Aspergillus nidulans Conidia: An Efficient Tool for Targeted Gene Recombination Using Selectable Nutritional Markers
Source: MDPI journal article supplement (doi:10.3390/jof7110961), 2021-11-12
Supplement: s1 [file s1]

**Table S1.** Solutions and media used for ATMT of *A. nidulans* conidia.

| <b>Solution</b>                       | <b><i>At</i>-minimal<br/>medium (<i>At</i>-MM)<br/>100 ml</b> | <b><i>At</i>-induction<br/>medium (<i>At</i>-IM)<br/>100 ml</b> | <b>Solid <i>At</i>-IM for co-<br/>culture 1 litre</b> |
|---------------------------------------|---------------------------------------------------------------|-----------------------------------------------------------------|-------------------------------------------------------|
| Buffer K                              | 1 ml                                                          | 1 ml                                                            | 10 ml                                                 |
| Buffer M-N                            | 2 ml                                                          | 2 ml                                                            | 20 ml                                                 |
| CaCl <sub>2</sub> 1 %                 | 100 µl                                                        | 100 µl                                                          | 1 ml                                                  |
| Glucose (20%)                         | 1 ml                                                          | 500 µl                                                          | 5 ml                                                  |
| NH <sub>4</sub> NO <sub>3</sub> (20%) | 250 µl                                                        | 250 µl                                                          | 2.5 ml                                                |
| MES (1M)                              | -                                                             | 4 ml                                                            | 40 ml                                                 |
| Glycerol (50%)                        | -                                                             | 1 ml                                                            | 10 ml                                                 |
| Bacteriological agar                  | -                                                             | -                                                               | 15 g                                                  |
| Sterile distilled water               | 94.05 ml                                                      | 89.45 ml                                                        | 894.5 ml *                                            |
| FeSO <sub>4</sub> (0.01%)             | 1 ml                                                          | 1 ml                                                            | 10 ml                                                 |
| Trace elements                        | 500 µl                                                        | 500 µl                                                          | 5 ml                                                  |
| Acetosyringone (200 mM)               | -                                                             | 100 µl                                                          | 1 ml                                                  |
| Kanamycin (50 mg/ml)                  | 100 µl                                                        | 100 µl                                                          | 1 ml                                                  |

\* Liquid *At*-MM and *At*-IM were prepared by adding the sterilized components to sterile distilled water under aseptic conditions; for solid *At*-IM, the agar was dissolved and autoclaved in distilled water and the sterilized components were added during cooling (~50°C) prior to pouring plates.

Buffer K (100 ml): 20 g K<sub>2</sub>HPO<sub>4</sub>; 14.5 g KH<sub>2</sub>PO<sub>4</sub>; pH 7. Sterilize by autoclaving; store at 4°C.

Buffer M-N (100 ml): 3 g MgSO<sub>4</sub>·7H<sub>2</sub>O; 1.5 g NaCl. Sterilize by autoclaving; store at 4°C.

1% CaCl<sub>2</sub>: Prepare from a concentrated stock in sterile distilled water. Store at 4°C. Sterilize concentrated stock by filtration and store at room temperature.

20% NH<sub>4</sub>NO<sub>3</sub> (100 ml): 20 g NH<sub>4</sub>NO<sub>3</sub>. Sterilize by autoclaving; store at 4°C.

20% Glucose (100 ml): 20 g glucose. Sterilize by autoclaving; store at 4°C.

FeSO<sub>4</sub>·7H<sub>2</sub>O (100 ml): 0.01 g FeSO<sub>4</sub>·7H<sub>2</sub>O. Prepare from a concentrated stock in distilled water. Sterilize the stock with two to three 10 second pulses in the microwave and store at 4°C in darkness.

1M MES (2-(N-Morpholino) ethanesulfonic acid) (100 ml): 19.52 g; pH 5.3. Sterilize by filtration, aliquot and store at -20°C. (Sigma Ref. M8250-25G).

50% (v/v) Glycerol (100 ml): 50 ml of 100% glycerol. Sterilize by autoclaving; store at 4°C.

Trace element solution (1000 ml): 100 mg ZnSO<sub>4</sub>·7H<sub>2</sub>O; 100 mg CuSO<sub>4</sub>·5H<sub>2</sub>O; 100 mg H<sub>3</sub>BO<sub>3</sub>; 100 mg MnSO<sub>4</sub>·H<sub>2</sub>O; 100 mg Na<sub>2</sub>MoO<sub>4</sub>·2H<sub>2</sub>O. Sterilize by filtration; store at 4°C.
